# Supplementary material
Source: Springer Nature journal article supplement (https://www.springermedizin.de/resource/supplementary/13722_2013_245_MOESM2_ESM.docx/9675334)

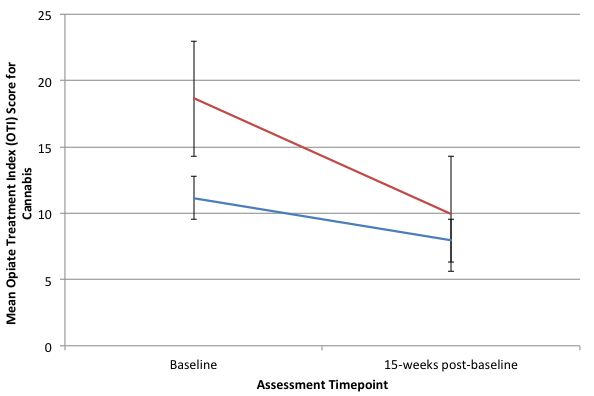

Supplement: MOESM2 [file 9675334]
